# Supplementary material for: Construction and validation of the prognostic model for patients with neuroendocrine cervical carcinoma: a competing risk nomogram analysis
Source: BMC Cancer. 2022 Jan 3;22:4. doi: 10.1186/s12885-021-09104-9 (PMC8722105; doi:10.1186/s12885-021-09104-9)
Supplement: Supplementary file 2 — Additional file 2: Table S1. Demographics and Clinicopathologic Characterisitcs of patients with NECC form the Wenling Maternal and Child Health Care Hospital dataset [file 12885_2021_9104_MOESM2_ESM.xlsx]

## Sheet: Sheet1
Table S1
Demographics and Clinicopathologic Characterisitcs of patients with NECC form the Wenling Maternal and Child Health Care Hospital dataset
Cetegory		Internal validation cohort (n=106)
		No. of patients (%)
Age(year)
<44		53 (50%)
44-67		36 (34%)
>67		17 (16%)
Year at diagnosis
2002-2009		49 (46.2%)
2010-2017		57 (53.8%)
Marital status
Married		56 (52.8%)
Single		43 (40.6%)
Other		7 (6.6%)
Ethnicity
Chinese		106 (100%)
Grade1
Low		10 (9.4%)
High		96 (90.6%)
Stage
Ⅰ		54 (50.9%)
Ⅱ		27 (25.5%)
Ⅲ		22 (20.8%)
Ⅳ		3 (2.8%)
Tumor size
<2 cm		27 (25.5%)
2-4 cm		23 (21.7%)
>4 cm		56 (52.8%)
Metastasis
Absent		79 (74.5%)
Present		27 (25.5%)
Surgery
Performed		57 (53.8%)
None		49 (46.2%)
Radiotherapy
Yes		42 (39.6%)
No		64 (60.4%)
Chemotherapy
Yes		70 (66.0%)
No		36 (34.0%)
Follow-up(months)
Mean±SE		45.8±4.4
Midian (range)		23 (1-154)
